# Supplementary material for: Early vaccination of laying hens with the live bivalent Salmonella vaccine AviPro™ Salmonella DUO results in successful vaccine uptake and increased gut colonization
Source: Front Microbiol. 2024 Jan 15;14:1327739. doi: 10.3389/fmicb.2023.1327739 (PMC10825957; doi:10.3389/fmicb.2023.1327739)
Supplement: Supplementary file 1 [file Table_1.XLSX]

## Sheet: Supp Table 1
Levels (cfu/g) of vSE and vST in caecal and liver samples taken 2 days post-vaccination of chickens
vacc. age:	1 d.o.				2 d.o.				3 d.o.				5 d.o.
sample	vSE		vST		vSE		vST		vSE		vST		vSE		vST
	Caec	liv	Caec	liv	Caec	liv	Caec	liv	Caec	liv	Caec	liv	Caec	liv	Caec	liv		P= positive after enrichment only
1	32000	ND	143000	P	400	P	ND	P	170000	P	74000	ND	ND	100	ND	ND		ND - none detected
2	1150000	ND	1890000	P	47000	P	2000	P	800	ND	100	ND	100	200	P	100
3	P	ND	250	ND	18000	P	P	ND	250	ND	50	P	ND	150	P	ND
4	450	ND	50	ND	580000	250	18000	150	ND	ND	P	ND	P	250	P	ND		3 flocks/gp
5	105000	ND	59000	ND	370000	P	2000	ND	107000	P	590000	P	ND	200	ND	ND		1-10 = House1
6	500	ND	350	P	81000	P	1000	ND	550	ND	100	ND	P	50	P	ND		11-20 = H2
7	750	ND	P	ND	840000	P	5000	ND	130000	P	129000	ND	100	150	P	ND		21-30 = H3
8	130000	ND	100	ND	15000	P	P	P	150	P	P	ND	P	500	P	P
9	460000	P	470000	P	35000	100	2000	ND	1100	P	50	ND	P	250	P	100
10	19000	P	35000	ND	13800	P	P	ND	450	ND	200	ND	ND	100	P	50
11	283000	P	25000	P	57000	P	1000	P	1100	ND	300	ND	ND	150	ND	ND
12	280000	P	13850	P	136000	P	1000	ND	4450	ND	200	ND	P	100	P	50
13	800	ND	P	1900	930000	50	67000	P	43000	50	163000	P	ND	700	ND	50
14	11050	ND	16450	1950	ND	P	4000	P	50	ND	P	ND	P	300	P	ND
15	1950	P	ND	250	38000	P	19000	P	P	ND	P	ND	20	350	P	ND
16	50	ND	50	ND	9600	200	ND	P	2100	ND	2850		100	150	P	ND
17	1450000	P	1300	P	37000	P	36000	P	100	ND	300	P	ND	400	100	ND
18	32000	ND	100	P	18300	P	P	ND	400	ND	P	ND	ND	450	P	ND
19	22000	P	P	P	133000	50	5000	ND	P	ND	ND	ND	P	250	ND	ND
20	220000	P	23000	P	79000	P	9000	P	8900	ND	150	ND	200	450	ND	ND
21	24000	P	700000	P	5400	P	ND	ND	50	ND	P	ND	40	450	ND	ND
22	2000	P	650	P	P	P	3000	ND	350	ND	P	ND	ND	150	ND	ND
23	128000	P	16350	700	3300	P	4000	ND	700	1650	P	ND	ND	250	ND	ND
24	276000	P	960000	P	1700	P	21000	ND	50	ND	P	ND	320	300	P	ND
25	3900000	ND	750000	P	400	P	ND	P	3450	P	250	ND	100	350	ND	P
26	117000	ND	8750	ND	2000	P	P	P	30000	P	5200	P	ND	150	ND	ND
27	1800	ND	P	P	11800	P	ND	ND	50	ND	P	ND	ND	100	ND	ND
28	3700	ND	P	ND	4100	P	P	ND	P	ND	P	ND	ND	300	ND	ND
29	44000	ND	8650	P	9400	P	P	ND	17000	P	56000	ND	ND	100	ND	ND
30	26000	ND	1200	P	300	P	P	ND	1600	P	50	P	P	300	P	ND

## Sheet: Supp Table 2
Levels (cfu/g) of vSE and vST in pooled faecal samples collected 2 days post-vaccination of chickens
vacc. age:	1 d.o.		2 d.o.		3 d.o.		5 d.o.			P= positive after enrichment only
Faecal pool	vSE	vST	vSE	vST	vSE	vST	vSE	vST
1	500	P	2400	P	600	P	400	P		Each sample consists of 10 individual faeces
2	900	P	1900	P	500	100	1700	200
3	1000	P	800	P	200	P	300	400		2 pools/flock
4	1000	100	1100	P	550	100	P	P		1, 2 = House1
5	2000	P	10300	P	1400	750	P	P		3, 4 = H2
6	10000	150	6600	P	50	P	100	200		5, 6 = H3
